# Supplementary material
Source: publisher figshare collection journal article supplement (https://frontiersin.figshare.com/ndownloader/files/24315677)

**S.Table 1. LPS routes distribution according to number of doctors for each country**

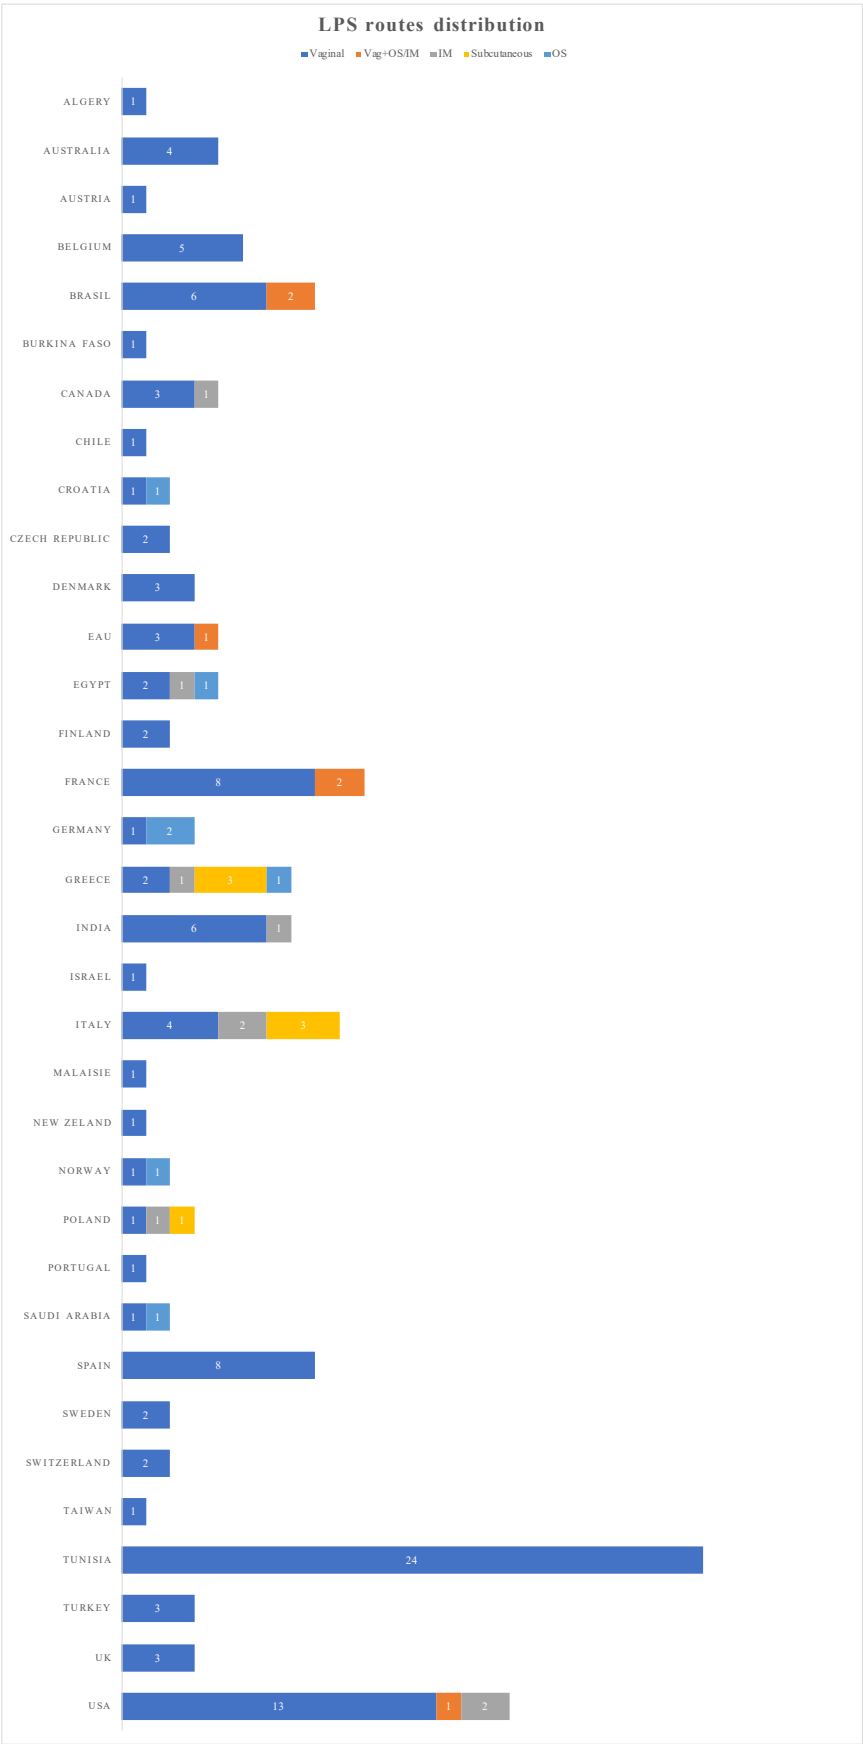

*Note. Vag + OS/IM: vaginal + oral or intramuscular, OS: oral, IM: intramuscular*

**S.Figure 2. LPS discontinuation according to number of doctors for each country**

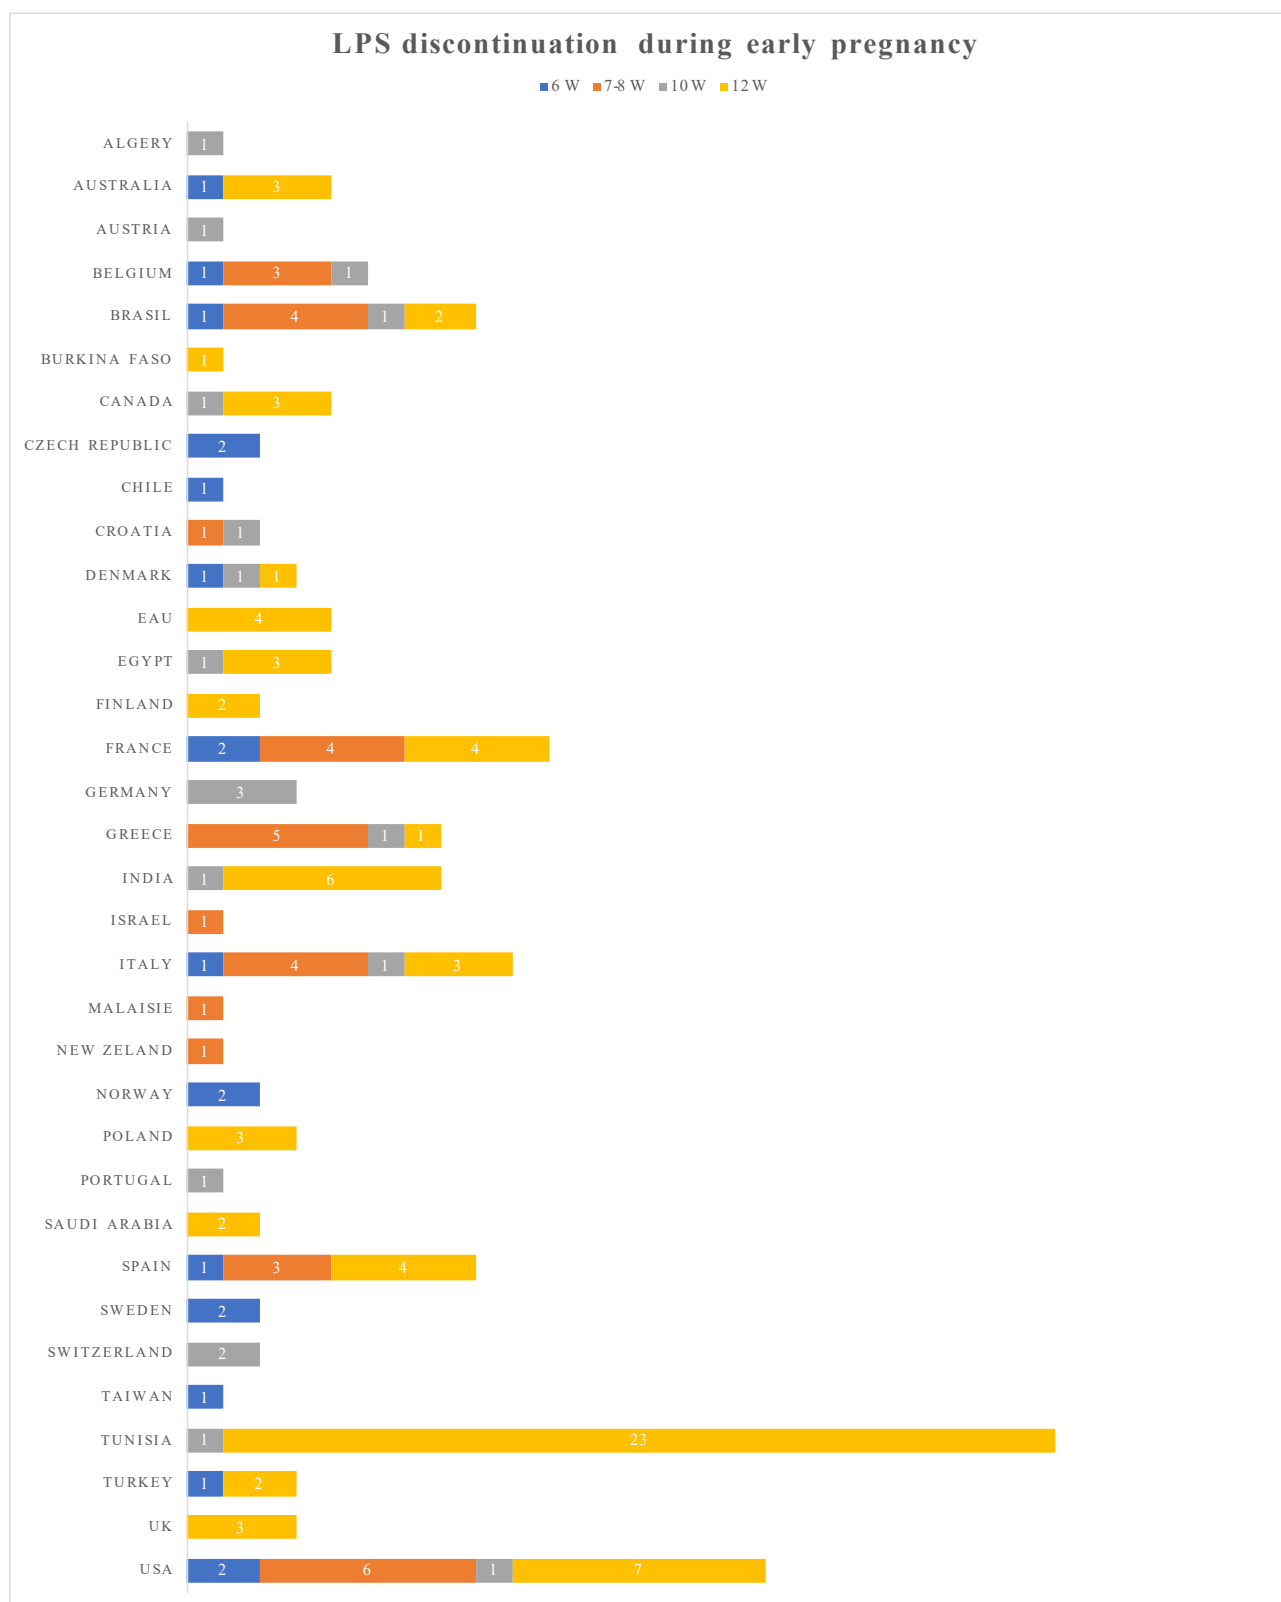

Supplement: Supplementary file [file 24315677]
